# Supplementary material for: airGRteaching: an open-source tool for teaching hydrological modeling with R
Source: Copernicus journal article supplement (doi:10.5194/hess-2022-421), 2023-01-02
Supplement: Supplementary file [file hess-2022-421-AC2-supplement.pdf]

Thank you very much for your review. We provide below some complements to answer the reviewer's remarks, and we also would like to use the open review feature to ask for more details regarding one of the reviewer's remarks.

**Q1:** *I think every tool has limitations, there is no perfect tool. As this tool has been used for teaching in various places, I am wondering what the limitations of this tool are (from the students and the lecturer's perspective). In the future, if someone wants to develop a similar tool, which expectations such a tool should be (also from the students and lecturer's perspectives). I think adding a section describing limitations of this tool and the future outlook for such a tool would be interesting.*

**A1:** We thank the reviewer for this interesting comment. Identifying some of the potential limitation of the airGRteaching package and similar tools is definitely something that would benefit to the manuscript. Regarding the outlook of such a tool, we consider that the "5. Perspectives" section of the manuscript already responds to this proposition.

Consequently, we propose to modify the "5. Perspectives" section by adding elements concerning potential limitations of such a tool.

**Q2:** *When I select „Mountainous“ or „Lowland basins“, there are some error messages (attached figure) appear in the GUI as well as in the Rstudio Console. I would be nice if the authors can fix this.*

**A2:** We recognize that the error message identified by the reviewer briefly appears when we change the selected basin. However, this message just appears temporarily and disappears within a tenth of second. This is due to the numerous interactions in the Shiny interface between the different panels. We did not manage to solve this issue so far, but we consider that this is not a problem at all, as this is temporary and does not provoke neither any false calculation nor any real crash of the interface.

If the reviewer was talking about another error message, we kindly ask him/her to describe the exact way to reproduce it, so that we can identify the problem.
