# Supplementary material for: airGRteaching: an open-source tool for teaching hydrological modeling with R
Source: Copernicus journal article supplement (doi:10.5194/hess-2022-421), 2023-01-02
Supplement: Supplementary file [file hess-2022-421-CC1-supplement.pdf]

Choose a dataset:

Mountainous basin

Choose a model:

Hydrological model

GR4J

Snow model

None

Parameters values:

X1 (production store capacity)

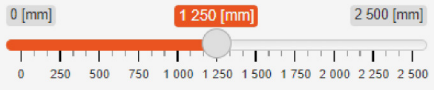

X2 (intercatchment exchange coeff.)

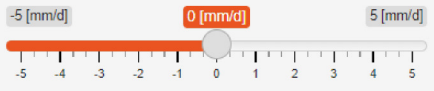

X3 (routing store capacity)

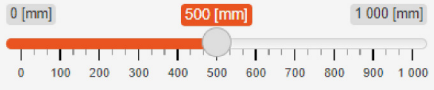

X4 (unit hydrograph time constant)

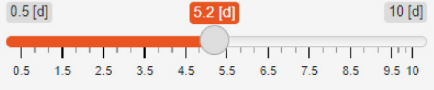

Choose a plot:

Flow time series

Select the time window:

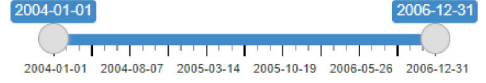

Error: Non convenient date for the simulation period "SimPer"

Error: Non convenient date for the simulation period "SimPer"

Show previous simulation (Qold)

No Yes

Download sim. as csv

Download plot as png

Error: Non convenient date for the simulation period "SimPer"
